# Supplementary material for: Incidence and Prognosis of Thyroid Cancer in Children: Based on the SEER Database
Source: Research Square preprint supplement (doi:10.21203/rs.3.rs-743194/v1), 2021-08-04
Supplement: Supplementary file 1 [file dea2a35ebd86fafe5a1c69cc.docx]

**TableS1.** Result of multiple risk factors analysis of prognosis of childhood TC

| Variables | OS (10years) | | | |
| --- | --- | --- | --- | --- |
| n (%) | Survive (%) | Log-rank | *P* |
| Year |  |  | 4.733 | 0.030 |
| 1975-2005 | 1870 (43.06) | 97.70 |  |  |
| 2006-2016 | 2473 (56.94) | 99.27 |  |  |
| Sex |  |  | 26.218 | <0.001 |
| Female | 3519 (81.03) | 97.98 |  |  |
| Male | 824 (18.97) | 94.78 |  |  |
| Race |  |  | 18.038 | <0.001 |
| White | 223 (5.23) | 97.64 |  |  |
| Black | 3602 (84.44) | 93.27 |  |  |
| other | 441 (10.34) | 96.83 |  |  |
| Histologic type |  |  | 23.689 | <0.001 |
| Differentied | 187 (4.45) | 94.65 |  |  |
| Undifferentied | 4014 (95.55) | 98.88 |  |  |
| Tumor size |  |  | 8.581 | 0.035 |
| <1 | 599 (16.10) | 99.17 |  |  |
| 1- | 972 (26.13) | 99.18 |  |  |
| 2- | 1423 (38.25) | 99.02 |  |  |
| ≥4 | 726 (19.52) | 97.80 |  |  |
| Metastasis |  |  | 44.519 | <0.001 |
| Localized | 2062 (48.61) | 97.87 |  |  |
| Regional | 1963 (46.28) | 97.91 |  |  |
| Distant | 217 (5.12) | 89.40 |  |  |
| First malignant |  |  | 43.768 | <0.001 |
| No | 123 (2.83) | 88.62 |  |  |
| Yes | 4220 (97.17) | 97.63 |  |  |
